1 **Field evaluation of a quantitative, and rapid malaria diagnostic system using a**  
2 **fluorescent Blue-ray optical device**

3

4 **Authors:** Takeki Yamamoto<sup>1,2</sup>, Muneaki Hashimoto<sup>3\*</sup>, Kenji Nagatomi<sup>2</sup>, Takahiro Nogami<sup>2</sup>,  
5 Yasuyuki Sofue<sup>2</sup>, Takuya Hayashi<sup>2</sup>, Yusuke Ido<sup>3</sup>, Shouki Yatsushiro<sup>3</sup>, Kaori Abe<sup>3</sup>, Kazuaki  
6 Kajimoto<sup>3</sup>, Noriko Tamari<sup>4</sup>, Beatrice Awuor<sup>5</sup>, George Sonye<sup>5</sup>, James Kongere<sup>6</sup>, Stephen Munga<sup>7</sup>,  
7 Jun Ohashi<sup>8</sup>, Hiroaki Oka<sup>2</sup>, Noboru Minakawa<sup>4</sup>, Masatoshi Kataoka<sup>3</sup>, Toshihiro Mita<sup>1\*</sup>

8 **Affiliations:**

9 <sup>1</sup> Department of Tropical Medicine and Parasitology, Juntendo University, Faculty of Medicine,  
10 Tokyo, Japan.

11 <sup>2</sup> Panasonic Corporation, Automotive & Industrial Systems Company, Osaka, Japan,

12 <sup>3</sup> National Institute of Advanced Industrial Science and Technology (AIST), Health Research  
13 Institute, Kagawa, Japan.

14 <sup>4</sup> Nagasaki University, Institute of Tropical Medicine, Nagasaki, Japan.

15 <sup>5</sup> Ability to Solve by Knowledge Project, Mbita, Homa Bay, Kenya.

16 <sup>6</sup> Nagasaki University Nairobi Research Station, NUITM-KEMRI Project, Nairobi, Kenya.

17 <sup>7</sup> Centre for Global Health Research, Kenya Medical Research Institute, Kisumu, Kenya.

18 <sup>8</sup> Department of Biological Sciences, Graduate School of Science, The University of Tokyo, Tokyo,  
19 Japan.

20 \* Correspondence to:

21 Toshihiro Mita ([tmita@juntendo.ac.jp](mailto:tmita@juntendo.ac.jp)), Muneaki Hashimoto ([muneaki-hashimoto@aist.go.jp](mailto:muneaki-hashimoto@aist.go.jp))

22 **Abstract:**

23 We improved a previously developed quantitative malaria diagnostic system based on fluorescent  
24 Blue-ray optical device. Here, we first improved the diagnostic system to enable fully automated  
25 operation and the field application was evaluated in Kenya. We detected *Plasmodium falciparum* in  
26 blood samples collected from 288 individuals aged 1-16 years using nested polymerase chain  
27 reaction (nPCR), rapid diagnostic test (RDT), and automated system. Compared to RDT, the  
28 automated system exhibited a higher sensitivity (100%; 95% confidence interval [CI], 93.3–100%)  
29 and specificity (92.8%; 95% CI, 88.5–95.8%). The limit of detection was 0.0061%. Linear regression  
30 analysis revealed a correlation between the automated system and microscopic examination for  
31 detecting parasitemia (adjusted  $R^2$  value=0.63,  $P=1.13\times 10^{-12}$ ). The automated system exhibited a  
32 stable quantification of parasitemia and a higher diagnostic accuracy for parasitemia than RDT. This  
33 indicates the potential of this system as a valid alternative to conventional methods used at local  
34 health facilities, which lack basic infrastructure.

35  
36 **Introduction**

37 Globally, malaria is one of the “big three” infectious diseases with approximately 37 million  
38 people at risk for contracting malaria (WHO, 2018). Malaria is a vector-borne disease, which is  
39 caused by infection from *Plasmodium* spp. and is transmitted by *Anopheles* mosquitoes. The United  
40 Nations Sustainable Development Goals had proposed to end the epidemic of malaria by 2030  
41 (WHO, 2015). Although the annual case fatality rate has not increased recently, 435,000 malaria-  
42 related deaths were recorded in over 100 countries in 2017 (WHO, 2018). Since 2014, new malaria  
43 cases have increased slightly with 219 million recorded cases in 2017 (Alonso and Noor, 2017;  
44 WHO, 2018). Several factors have stagnated the global progress against malaria, such as the  
45 emergence of insecticide-resistant vectors, poor access to insecticide-treated nets and artemisinin-  
46 based combination therapies, and inefficiency of tools that are currently used in malaria diagnosis,

47 treatment, and control (Alonso and Noor, 2017). Particularly, most tools were developed before the  
48 year 2000 and are not efficient to tackle the current malaria infection. Therefore, novel technologies  
49 must be scaled up to accelerate the development of new tools for malarial control and eradication  
50 (Alonso and Noor, 2017).

51 Malaria must be accurately diagnosed to ensure effective patient management and to prevent  
52 unnecessary treatment. Rapid diagnostic tests (RDTs), which detect malaria-specific antigens, such  
53 as histidine-rich protein 2 (HRP2), are easy to use, rapid, and affordable. Hence, RDTs are widely  
54 used even in remote areas, which do not have access to microscopic diagnosis. RDTs have wide  
55 sensitivity (63–100%) and specificity (53–100%) ranges for detecting *Plasmodium falciparum*  
56 (Boyce and O’Meara, 2017). However, RDTs are unable to determine the parasite infection rate in  
57 the red blood cells (RBCs) of peripheral blood (parasitemia), which can lead to the misdiagnosis of  
58 severe malaria. Additionally, the clearance of HRP2 antigen in the patient’s blood is very slow.  
59 Therefore, the presence of residual antigen potentially produces a persistent malaria-positive status  
60 even after several weeks post parasite clearance (Aydin-Schmidt et al., 2013). Furthermore, blood  
61 samples containing *Plasmodium falciparum* with deleted *HRP2* gene can be diagnosed as false-  
62 negative in RDT (Parr et al., 2016). Microscopic examination of Giemsa-stained blood smear is a  
63 low-cost method for diagnosing parasitemia and for differentiating *Plasmodium* species. However,  
64 microscopic examination involves labor-intensive steps and requires technical expertise for accurate  
65 diagnosis. Additionally, numerous studies suggest that submicroscopic malaria infections, which are  
66 not detectable by microscopy, can be a source of malaria transmission from humans to mosquitoes  
67 (Bousema et al., 2012; Bousema et al., 2014; Goncalves et al., 2017; Lin et al., 2015; Okell et al.,  
68 2012; Ouedraogo et al., 2009; Tadesse et al., 2018). The currently available malaria diagnostic  
69 methods cannot detect submicroscopic infections.

70 Recently, we had developed a portable, easy to operate, and battery driven fluorescent Blue-  
71 ray optical device for determining parasitemia (Yamamoto et al., 2019). Additionally, we

72 demonstrated almost a linear correlation between our malaria diagnostic system and microscopic  
73 examination for the detection of percentage parasitemia ( $R^2=0.99993$ ) in the range of 0.0001–1.0%  
74 (Yamamoto et al., 2019). The limit of detection (LOD) was 10 parasites/ $\mu$ L (Yamamoto et al., 2019),  
75 which was much lower than that (100–200 parasites/ $\mu$ L) achievable by microscopy and other malaria  
76 RDTs (Bell et al., 2006; Wongsrichanalai et al., 2007). However, these results were obtained under  
77 controlled laboratory conditions using a laboratory-cultured *P. falciparum* clone that was highly  
78 distinct from the strains found in patient samples obtained from malaria-endemic regions. In this  
79 study, we first improved the diagnostic system to enable fully automated operation. Further, we  
80 evaluated whether the automated system accurately diagnosed *P. falciparum* in individuals living in  
81 Kenya, a malaria endemic area.

82

## 83 **Results**

### 84 **Limit of detection of the 18S rRNA nested PCR**

85 The 18S rRNA nested nPCR method was used to detect the malaria parasites. The LOD of  
86 the parasite density was determined by nPCR using a laboratory-adapted 3D7 clone at a density  
87 range of 0.0375 to 4 parasites/ $\mu$ L (using 2-fold dilutions in 12 different rows) (Figure 1). A probit  
88 analysis was performed to determine the density at which the parasite could be detected with 95%  
89 confidence. The analysis revealed that LOD of the nPCR was 2.56 parasites/ $\mu$ L.

90

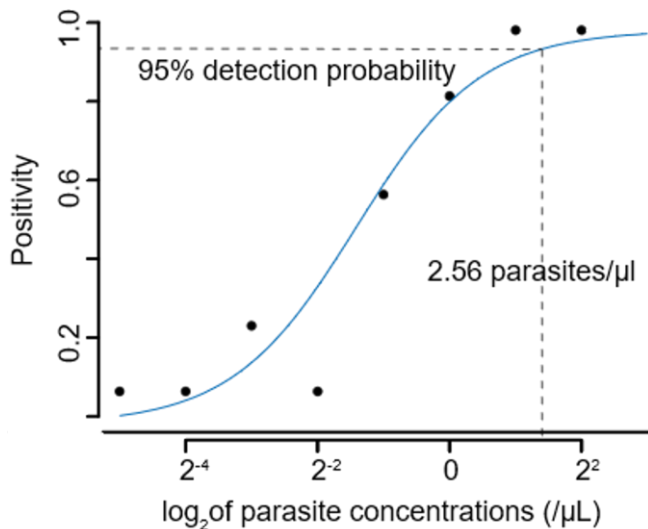

91

92 **Figure 1.** Limit of detection of 18S rRNA PCRs. 95% probability of limit of detection of 18S rRNA PCRs.

93 Dashed lines is 95% detection probability of parasite. Continuous lines is based on the probit analysis

94 using a serial dilution of 3D7 in vitro culture.

95

### 96 **Study subjects and malaria positive rates**

97 Among the 288 school children enrolled in this study, 11 children were excluded as we did  
98 not obtain adequate amount of blood samples (n=3) or because the blood coagulated (n=8) (Figure  
99 2). We performed nPCR analysis on the blood samples collected from the remaining 277 individuals.

100 The analysis revealed that 56 (20.2%) samples tested positive for the malaria parasite. Among the 56

101 parasite-positive samples, 48 samples tested positive only for *P. falciparum*, 4 samples tested

102 positive for *P. falciparum* and *P. ovale*, one sample tested positive for *P. falciparum* and *P.*

103 *malariae*, and three samples tested positive only for *P. ovale* (Table 1). Since this study focused on

104 the diagnosis of *P. falciparum*, we excluded the three samples that tested positive only for *P. ovale*

105 from further analysis. In total, 274 individuals (95.1% of the total enrolled subjects) underwent

106 diagnosis for malaria parasites.

107

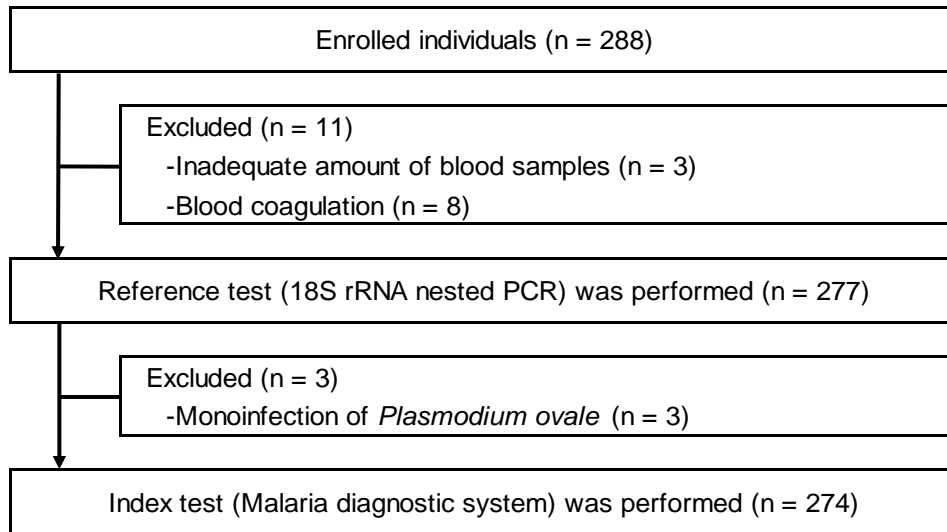

108

109 **Figure 2.** Flow diagram for the diagnosis of malaria parasites in the participants.

110

111 The mean age of the participants was 8.4 years (range: 1–16 years). Almost none of the  
112 individuals exhibited malaria symptoms (Table 1). The mean hemoglobin level among the study  
113 subjects was 12.2 g/dL. Only three individuals had a hemoglobin level of less than 7 g/dL. The  
114 median percentage parasitemia in the malaria parasite-positive samples as determined by nPCR was  
115 0.04% (range: 0.00043–1.3%).

116

117 **Table 1.** Demographic characteristics of 274 Kenyan individuals.

| <b>Characteristics</b>                                                             |                           |
|------------------------------------------------------------------------------------|---------------------------|
| Age (years)                                                                        |                           |
| ≤2                                                                                 | 29                        |
| 3–5                                                                                | 60                        |
| 6–10                                                                               | 93                        |
| 11≤                                                                                | 92                        |
| Average                                                                            | 8.4                       |
| Sex                                                                                |                           |
| Male                                                                               | 119                       |
| Female                                                                             | 155                       |
| Hemoglobin (g/dL)                                                                  |                           |
| <7                                                                                 | 3                         |
| 7–9                                                                                | 22                        |
| 10–13                                                                              | 162                       |
| 13<                                                                                | 87                        |
| Mean (95% CI)                                                                      | 12.1 ± 0.2                |
| <i>Plasmodium</i> infection status evaluated by nested PCR (number of individuals) |                           |
| <i>Pf</i>                                                                          | 48                        |
| <i>Pf+Po</i>                                                                       | 4                         |
| <i>Pf+Pm</i>                                                                       | 1                         |
| Negative                                                                           | 221                       |
| Parasitemia; (%)                                                                   |                           |
| Median (range)                                                                     | 0.04%<br>(0.00043%–1.32%) |
| <i>Plasmodium</i> infection status evaluated by RDT* (number of individuals)       |                           |
| Positive                                                                           | 152                       |
| Negative                                                                           | 122                       |

118 \*Rapid diagnostic test

119

120 The sensitivity and specificity of the RDT were 98.1% and 54.8%, respectively (Table 2).

121 The negative predictive value of the RDT was very high (99.2%), while positive predictive value  
122 was low (only 34.2%).

123

124 **Table 2.** Diagnostic performance of *Plasmodium falciparum* infection in 274 Kenyan individuals.

|                           | Sensitivity                         | Specificity            | PPV*                   | NPV <sup>†</sup>       | Accuracy               |
|---------------------------|-------------------------------------|------------------------|------------------------|------------------------|------------------------|
| Malaria diagnostic system | 100.0%<br>(93.3%–100%) <sup>‡</sup> | 92.8%<br>(88.5%–95.8%) | 76.8%<br>(65.1%–86.1%) | 100.0%<br>(98.2%–100%) | 94.2%<br>(90.7%–96.6%) |
| RDT <sup>§</sup>          | 98.1%<br>(90.0%–100%)               | 54.8%<br>(47.9%–61.4%) | 34.2%<br>(26.7%–42.3%) | 99.2%<br>(95.5%–100%)  | 63.1%<br>(57.1%–68.9%) |

\*Positive predictive value

<sup>†</sup>Negative predictive value

<sup>‡</sup>95% confidence interval

<sup>§</sup>Rapid diagnostic test

125

126

## 127 **Development of SiO<sub>2</sub> nanofiber device**

128 Previously, we had developed a SiO<sub>2</sub> nanofiber filtration system that could remove WBCs  
129 and platelets (Yatsushiro et al., 2016). By the modification of SiO<sub>2</sub> nanofiber surface and strict  
130 control of pore size, only RBCs can pass through this filtration system, which can be executed  
131 without a centrifugation step. However, this SiO<sub>2</sub> nanofiber filter was not incorporated within the  
132 scan disc of the diagnostic system and an additional manual step was required for the malaria  
133 diagnosis. Hence, we developed a SiO<sub>2</sub> nanofiber filter that is small enough to be placed inside the  
134 scan disc. To verify the functioning of the fabricated SiO<sub>2</sub>, we analyzed the blood samples obtained  
135 from Kenyan individuals. We observed that the redesigned SiO<sub>2</sub> nanofiber filtration system removed  
136 most of the white blood cells (WBCs). The median number of remaining WBCs on the detection area  
137 was 44 (Figure 3). This system could also efficiently remove the platelets. The mean and median  
138 percentages of the filtered platelets were 90.2% and 91.7%, respectively (Table 3).

139



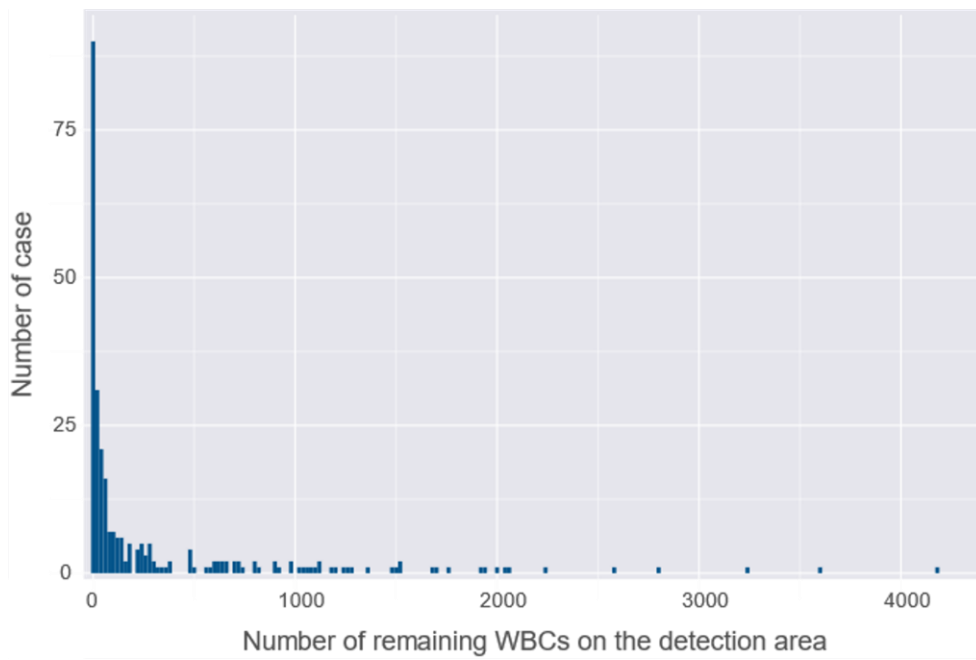

140

141 **Figure 3.** Evaluation of reformed SiO<sub>2</sub> nanofiber device for the removal of WBCs. Remaining WBCs on  
142 the detection area. Median number of remaining WBCs was 44 (7 in 1st quartile, 280 in 3rd quartile).

143 Blood samples from Kenya individuals were used (n = 274)

144

145 **Table 3.** Evaluation of reformed SiO<sub>2</sub> nanofiber device for the removal of platelets.

|                                     | Removed platelets (%) |
|-------------------------------------|-----------------------|
| Number of samples*                  | 11                    |
| Average                             | 90.2                  |
| Median (1st quartile, 3rd quartile) | 91.7 (83.3, 100)      |

146 \*blood samples of healthy Japanese volunteers

147

### 148 **Determination of parasitemia with the redesigned malaria diagnostic system**

149 After the removal of WBCs and platelets by the SiO<sub>2</sub> nanofiber filtration system, the RBCs  
150 were allowed to spread on the detection area, which were stained with a pre-adsorbed nuclear-  
151 specific fluorescence dye (Hoechst 34580). The staining yielded fluorescent-positive images of the  
152 malaria parasites in the infected cells (Figure 4A). Fluorescence intensity of malaria parasite was  
153 evidently lower than that of WBC (Figure 4B). Fluorescence intensities that were 1.4–2.4-times

154 higher than those of uninfected RBCs (Figure 4B) and had a fluorescent spot with a size from 1.0  
155  $\mu\text{m}^2$  to 10  $\mu\text{m}^2$  were considered to be malaria-infected RBCs {Yamamoto, 2019 #27904}. As  
156 hemoglobin has a strong absorption peak at the excitation wavelength of 400 nm (Lee et al., 2009),  
157 even RBCs can be visualized by the image reader in our diagnostic system. These images enabled us  
158 to visually count the number of RBCs and the fluorescence spots of the malaria parasites. The  
159 fluorescent image reader software identified *P. falciparum* (Figure 4B) and quantitatively measured  
160 the proportion of infected RBCs among the total counted RBCs. In general, platelets are not stained  
161 by the Hoechst 34580. However, a very small proportion of platelets were stained with this dye. In  
162 most cases, these platelets located outside RBC with distinguishable shape and fluorescent intensity  
163 from malaria parasites (Figure 4C).  
164

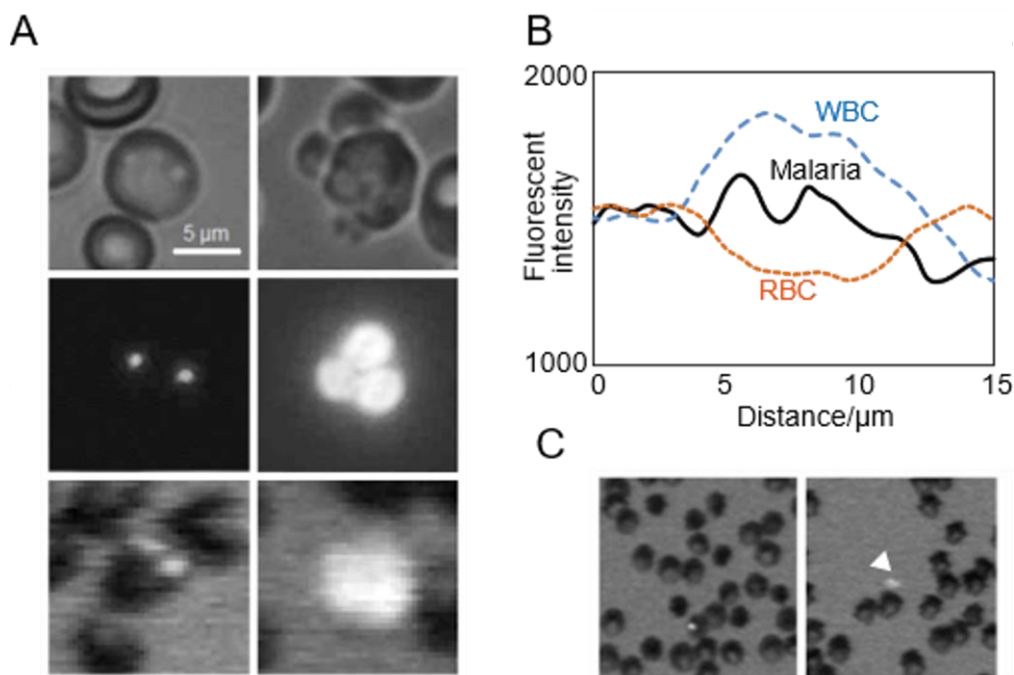

165  
166 **Figure 4.** Discrimination of malaria parasites, WBCs and platelets on the fluorescent blue-ray optical  
167 system. (A) Malaria parasite (Left) and WBC dispersed (Right) on the scan disc. Differential interference-  
168 contrast microscopic images (Upper), Conventional fluorescence microscopic images (Middle) and  
169 fluorescence images by fluorescent blue-ray image reader (Lower). (B) Fluorescence- intensity profiles  
170 of RBC with malaria parasite (Black line), uninfected RBC (Orange dotted line) and WBC (Blue dotted

171 line). The fluorescence- intensity profiles were measured along the yellow arrow in each image in Figure  
172 4-figure supplement 1. (C) Conventional fluorescence microscopic images of malaria parasite (Left) and  
173 platelet (Right, arrowhead).

174

175 The average number of purified RBCs on the detection area was 836,863 (95% CI: 737,174–  
176 936,552) in *P. falciparum* positive samples (n = 53) and 912,556 (95% CI: 862,220–962,893) in *P.*  
177 *falciparum* negative samples (n = 221), respectively (Table 4). The number of fluorescent-positive  
178 spots diagnosed as malaria parasites on the detection area ranged from 23–5,130 in *P. falciparum*  
179 positive samples. However, in average 16.1 spots were also diagnosed as malaria parasites in *P.*  
180 *falciparum* negative samples.

181

182 **Table 4.** Number of RBCs and fluorescent-positive spots on the detection area.

| Estimates                                                               |                            |
|-------------------------------------------------------------------------|----------------------------|
| <i>P. falciparum</i> positive samples                                   |                            |
| Number of samples                                                       | 53                         |
| Mean counted RBCs (95%CI <sup>*</sup> )                                 | 836,863 (737,174, 936,552) |
| Fluorescent-positive spots diagnosed as malaria parasites (Mean, Range) | 499 (23–5,130)             |
| <i>P. falciparum</i> negative samples                                   |                            |
| Number of samples                                                       | 221                        |
| Mean counted RBCs (95%CI <sup>*</sup> )                                 | 912,556 (862,220, 962,893) |
| Fluorescent-positive spots diagnosed as malaria parasites (Mean, Range) | 16.1 (0–117)               |

183 <sup>\*</sup>95% Confidence interval

184

185

186 We first determined the critical value (CV) and LOD of our diagnostic system using  
187 parasite-negative blood samples obtained from Kenyan individuals (n=221). The percentage  
188 parasitemia evaluated by the malaria diagnostic system for these samples ranged from 0 to 0.01%  
189 (mean: 0.0018% and standard deviation (SD): 0.0018%) (Table 5). We calculated the CV and LOD  
190 of the malaria diagnostic system from these values, which were 0.0048% and 0.0077%, respectively.

191 As the CV is generally used as a cutoff value for distinguishing positive results from negative results  
 192 (Currie, 1995; IUPAC, 1997; Lavin et al., 2018), we adopted 0.0048% as the cutoff value for  
 193 detecting parasitemia (Table 5).

194

195 **Table 5.** Critical value (CV) and limit of detection (LOD) of parasites of the automated malaria diagnostic  
 196 system.

| Estimates                                                                                                                 | %        |
|---------------------------------------------------------------------------------------------------------------------------|----------|
| Percentage of parasitemia determined by automated malaria diagnostic system in parasite negative Kenyan samples (N = 221) |          |
| Mean (%)                                                                                                                  | 0.001802 |
| SD* (%)                                                                                                                   | 0.001799 |
| Estimation with automated malaria diagnostic system                                                                       |          |
| LOD (%)                                                                                                                   | 0.007722 |
| CV (%)                                                                                                                    | 0.004762 |
| Regressed to percentage parasitemia by microscopy <sup>†</sup>                                                            |          |
| LOD (%)                                                                                                                   | 0.006122 |
| CV (%)                                                                                                                    | 0.003118 |

\*Standard deviation

197 <sup>†</sup>Estimated LOD and CV with automated malaria diagnostic system were regressed to the  
 198 microscopically determined parasitemia.

199

200 The sensitivity and specificity of the malaria diagnostic system were 100% (95%CI, 93.3–  
 201 100%) and 92.8% (95%CI, 88.5–95.8%), respectively (Table 2). The positive and negative predictive  
 202 values were 76.8% (95%CI, 65.1–86.1%) and 100% (95%CI, 98.2–100%), respectively. The  
 203 specificity obtained by our diagnostic system was significantly higher than that obtained by rapid  
 204 diagnostic test (RDT) (54.8%) ( $P=2.2 \times 10^{-16}$ , McNemar's test). We obtained false-positive results  
 205 from 16 cases (Supplementary File 1), which may be due to infection from a very low number of  
 206 parasites that is below the LOD of nPCR. Therefore, we verified the absence of the parasite by  
 207 microscopic evaluation of 500 visual fields. Our microscopic analysis revealed that all samples that  
 tested negative in nPCR analysis also tested negative in the microscopic analysis. There was no

208 correlation between false-positive results and parasitemia, hemoglobin level or the number of  
209 remaining WBCs on the detection area (Table 6). However, we observed a significant correlation  
210 between age and false-positive cases (P=0.023, Welch Two Sample t-test), where false-positive cases  
211 were positively correlated with higher average age.

212

213 **Table 6.** Characteristics of false-positive cases with automated malaria diagnostic system.

|                                                           | True positive | False positive | P               |
|-----------------------------------------------------------|---------------|----------------|-----------------|
| N                                                         | 53            | 16             |                 |
| Age (mean, years old)                                     | 8.4           | 11.2           | 0.02267*        |
| Sex (Female%)                                             | 43.4%         | 31.3%          | NS <sup>†</sup> |
| Hemoglobin (mean, g/dL)                                   | 11.8          | 12.7           | NS*             |
| Counted RBC by automated malaria diagnostic system (mean) | 836862.9      | 849898.3       | NS*             |
| Remaining WBC on the detection area (mean)                | 352.6981      | 253.25         | NS*             |

\*Welch Two Sample t-test

<sup>†</sup>Pearson's Chi-squared test with Yates' continuity correction

214

215 To assess the variability in diagnostic accuracy across different groups of participants, we  
216 analyzed the blood samples obtained from Japanese healthy volunteers (n=40) (Table 7). The malaria  
217 parasite-positive samples were prepared by adding the *P. falciparum* laboratory clone (3D7) to the  
218 blood samples and the samples were analyzed using our diagnostic system. The analysis revealed  
219 that the diagnostic values obtained in the blood samples of Japanese healthy volunteers were similar  
220 to those obtained in the blood samples of Kenyan individuals. The sensitivity and specificity of the  
221 malaria diagnostic system were 93.3% (95% CI, 68.1 to 99.8) and 92.0% (95% CI, 74.0 to 99.0),  
222 respectively.

223

224

225 **Table 7.** Diagnostic accuracy of automated malaria diagnostic system for 40 Japanese volunteers

|                                                                                                           |                                |
|-----------------------------------------------------------------------------------------------------------|--------------------------------|
| Samples                                                                                                   |                                |
| <i>P. falciparum</i> Positive (parasitemia)*                                                              | 15 (0.00064-0.073%)            |
| Negative                                                                                                  | 25                             |
| Parasitemia determined by automated malaria diagnostic system in 25 <i>P. falciparum</i> negative samples |                                |
| Mean (%)                                                                                                  | 0.00046                        |
| SD (%)                                                                                                    | 0.00024                        |
| Estimation with automated malaria diagnostic system                                                       |                                |
| LOD (%)                                                                                                   | 0.00125                        |
| CV (%)                                                                                                    | 0.00086                        |
| Diagnostic performance of malaria diagnostic system                                                       |                                |
| True positive                                                                                             | 14                             |
| False positive                                                                                            | 1                              |
| True negative                                                                                             | 23                             |
| False negative                                                                                            | 2                              |
| Sensitivity (%)                                                                                           | 93.3 (68.1, 99.8) <sup>§</sup> |
| Specificity (%)                                                                                           | 92 (74.0, 99.0)                |
| PPV <sup>†</sup> (%)                                                                                      | 87.5 (61.7, 98.4)              |
| NPV <sup>‡</sup> (%)                                                                                      | 95.8 (78.9, 99.9)              |
| Accuracy (%)                                                                                              | 92.5 (79.6, 98.4)              |

\*Positive samples were created by the artificial addition of *P. falciparum* laboratory clone (3D7).

<sup>†</sup>Positive predictive value

<sup>‡</sup>Negative predictive value

<sup>§</sup>95% confidence interval

226

227

228 **Regression analysis of parasitemia determined by revamped malaria diagnostic**  
 229 **system and by microscopy**

230 We evaluated the degree of correlation between the percentage parasitemia obtained by our  
 231 diagnostic system and that obtained by microscopy in 53 malaria parasite-positive samples (Table 8).

232 As the percentage parasitemia values did not exhibit a normal distribution in both methods, the data

233 were log-transformed. Pearson's correlation test revealed a significant correlation between the  
234 parasitemia percentage values determined by the two methods ( $r=0.80$ ,  $P=1.2\times 10^{-12}$ ). A strong  
235 correlation was also obtained by Spearman's rank-correlation test ( $r=0.83$ ,  $P=2.6\times 10^{-29}$ ). These  
236 results indicated a linear correlation between the percentage parasitemia value obtained by the  
237 automated malaria diagnostic system and that obtained by microscopy.

238

239 **Table 8.** Degree of coincidence between parasitemias obtained by automated malaria diagnostic system  
240 and microscopy.

| Statistical methods              | Coefficient | P                    |
|----------------------------------|-------------|----------------------|
| Spearman's rank-correlation test | 0.83        | $2.6\times 10^{-29}$ |
| Pearson's correlation test       | 0.8         | $1.2\times 10^{-12}$ |

241

242

243 Next, we performed a linear regression analysis to correlate the percentage parasitemia values  
244 obtained by the two detection methods (Figure 5). This analysis yielded the following equation:  
245 Predicted logarithmic transformed parasitemia by microscopy =  
246  $0.74 + (1.40 \times \text{parasitemia by automated malaria diagnostic system})$  with an adjusted  $R^2$  value  
247 of 0.6254 ( $P=1.13\times 10^{-12}$ ). As mentioned previously, the CV and LOD for our diagnostic system were  
248 0.0048% and 0.0077%, respectively (Table 5). Using this regression equation, the corresponding CV  
249 and LOD for the microscopically determined parasitemia were estimated to be 0.0031% and  
250 0.0061%, respectively (Table 5).

251

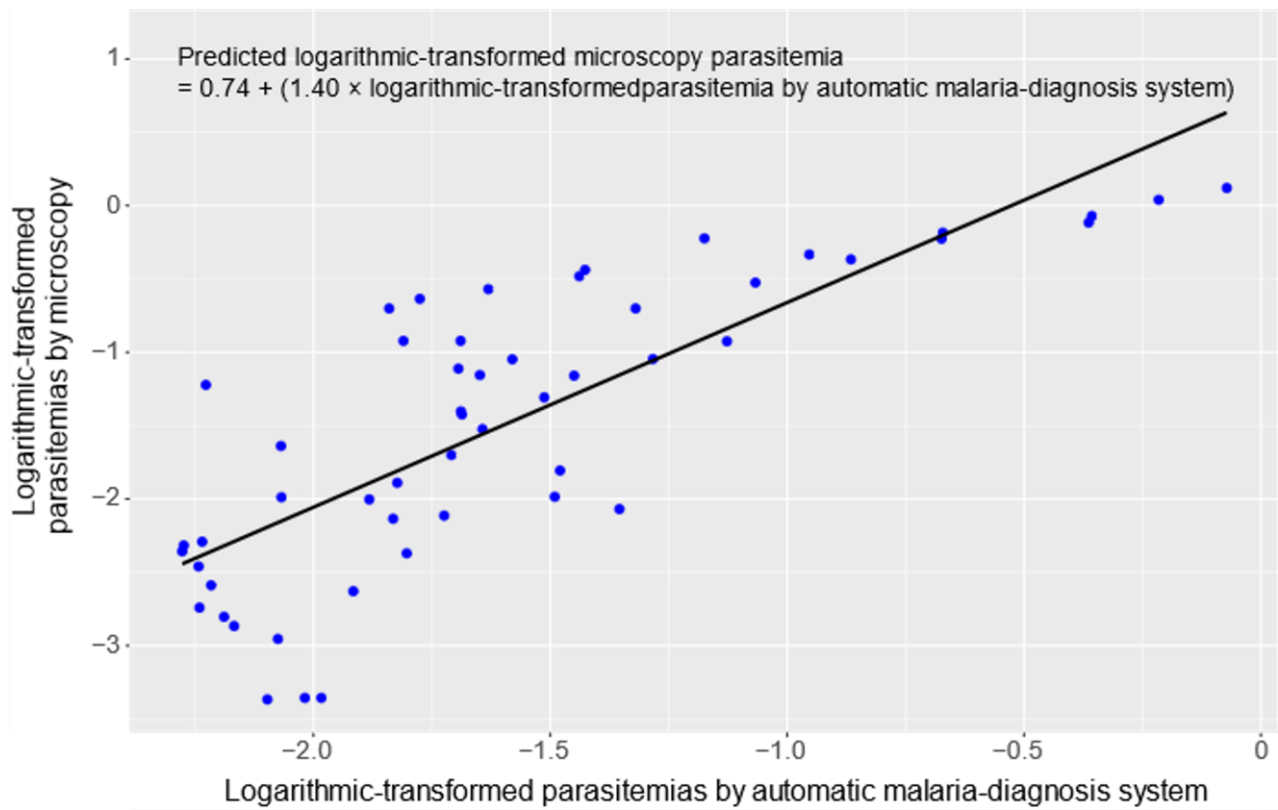

252

253 **Figure 5.** Linear regression analysis of the correlation of the percentage parasitemia obtained by the  
254 automated malaria diagnostic system with that obtained microscopically.

255

## 256 Discussion

257 Previously, we had performed an *in vitro* evaluation of our fluorescent Blue-ray optical  
258 device-based malaria diagnostic system (Yamamoto et al., 2019). In this study, we redesigned the  
259 blood cell-filtering system and evaluated the field application of the redesigned device in a malaria-  
260 endemic region in Kenya. For this study, we enrolled Kenyan individuals who exhibited a very low  
261 parasitemia percentage (median: 0.04%) (Table 1). Our automated malaria diagnostic system could  
262 detect malaria parasites with a high sensitivity value (100%) (Table 2). Additionally, the specificity  
263 (92.8%) of our diagnostic system was much higher than that observed for other commercial RDTs  
264 (55%). The high specificity of diagnosis may prevent unnecessary administration of antimalarial  
265 drugs to non-malaria parasite-infected individuals. Consequently, this may alleviate the risks  
266 associated with the emergence and spread of drug-resistant malaria parasites (WHO, 2011).



267 The estimated LOD of our diagnostic system for the microscopically adjusted parasitemia in  
268 Kenyan individuals was 0.0061% (305 parasites/ $\mu$ L) (Table 5), which was approximately 30 times  
269 higher than that observed in our previous study (0.0002%, 10 parasites/ $\mu$ L) (Yamamoto et al., 2019).  
270 The LOD is mostly determined by the number of fluorescent spots that are incorrectly recognized as  
271 malaria parasites in the parasite-negative samples. One potential cause of these incorrectly detected  
272 fluorescent spots is the Howell–Jolly bodies (HJBs), which are round and small ( $\sim$ 1  $\mu$ m) nuclear  
273 remnants in the RBCs (Sears and Udden, 2012). The HJBs are morphologically similar to the malaria  
274 parasite nucleus (Lynch, 1990). Additionally, HJBs can also be stained with Hoechst 34580. These  
275 HJBs can be misdiagnosed as malaria parasites when their fluorescence intensity and size are similar  
276 to those of the parasite nucleus. In healthy individuals with a normal-functioning spleen, RBCs with  
277 HJBs are removed efficiently from the peripheral blood circulation by the spleen, and only a few of  
278 them (approximately 20/ $10^6$  RBCs) are present in the peripheral blood (de Porto et al., 2010). This  
279 was reported in a previous study that estimated LOD using RBCs from healthy Japanese volunteers  
280 (Yamamoto et al., 2019). However, RBCs with HJBs are not efficiently removed from the blood in  
281 patients after splenectomy or in patients with a non-functioning spleen (Davis, 1976; Pearson et al.,  
282 1969). In sickle cell disease, where splenic dysfunction begins early in life, the number of HJBs is  
283 approximately 100 times higher than that in healthy individuals (Harrod et al., 2007). Recent or acute  
284 *P. falciparum* infection was reported to induce an alteration in the splenic architecture in young  
285 children, potentially resulting in hyposplenic function (Gomez-Perez et al., 2014). Therefore, it is  
286 likely that the samples obtained in Kenya had a greater number of HJBs than the samples obtained  
287 from the healthy Japanese volunteers, which would explain the higher LOD observed in this study.

288 The other cause for the high LOD may be the platelets. Generally, platelets are not stained by  
289 the DNA-specific dyes. However, it is possible that a very small proportion of platelets were stained  
290 with this dye (Figure 4C). If the stained platelets attach to the surface of RBCs they could potentially  
291 be misrecognized as fluorescent spots derived from the parasitic nucleus. The blood samples used in

292 our earlier study were obtained from the Japanese Red Cross Society and had been pretreated for  
293 RBC transfusion. Therefore, approximately 99% of the platelets had been removed before the  
294 analysis. In this study, we used fresh blood samples obtained from Kenyan individuals. To remove  
295 the platelets, we had developed SiO<sub>2</sub> nanofiber filters (Yatsushiro et al., 2016), which were  
296 redesigned in this study. The revamped SiO<sub>2</sub> nanofiber filters trapped approximately 90% of platelets  
297 (Table 3), which was relatively lower than the method used for the RBC purification for blood  
298 transfusions (99%). This indicated that more platelets were likely to have remained on the detection  
299 area. Further improvement of the filtration performance of the SiO<sub>2</sub> nanofiber filter to decrease the  
300 number of platelets may lower the LOD. Moreover, the ability to distinguish the malaria parasites  
301 from the platelets or HJBs could be improved by enhancing the resolution of the scanned detection  
302 area. A resolution of 0.5 μm was already achieved in the current system (Yamamoto et al., 2019).  
303 However, super-resolution techniques, such as the use of a smaller spot size and an objective lens  
304 with a higher numerical aperture and/or image processing by image convolution, can potentially  
305 enhance the resolution of the detection area (Bouwhuis, 1985; J., 1988).

306 To reduce the number of manual steps required after blood sampling, we downsized the cell  
307 separation device and mounted it on the scan disc (Figure 6B and Figure 6-figure supplement 1).  
308 This refinement enabled the automation of the diagnostic system and reduced the amount of blood  
309 needed for diagnosis. Since the revamped separation device is made of resin by conventional  
310 injection molding, the required number of parts, manufacturing steps, and costs can be reduced.

311 The determination of parasitemia as a point-of-care (POC) test is extremely important as it  
312 can reduce the risk of overlooking patients with severe malaria, because high parasitemia is one of  
313 the important findings for suspected severe malaria. Furthermore, regular monitoring of the patient's  
314 parasitemia after treatment is useful for the evaluation of therapeutic efficacy and for detecting  
315 resistance to antimalarial agents at an early stage. Various technologies have been used for the  
316 development of quantitative malaria diagnostic system, including magnetic resonance relaxation

317 (Peng et al., 2014), flow cytometry (Tougan et al., 2018), automatic counting from digitally captured  
318 images of Giemsa-stained blood smears (Racsá et al., 2015; Rosado et al., 2017), and the evaluation  
319 of acoustic signals of vapor-generated nanobubbles from hemozoin (Lukianova-Hleb et al., 2014).  
320 However, these new devices may not be suitable for POC as they are not portable and require huge  
321 power supply. However, our malaria diagnostic system is portable, battery driven, and robust.  
322 Robustness is particularly important as malaria diagnosis is commonly performed in tropical regions  
323 with severe conditions, such as high temperature, humidity, and dusty environment. We previously  
324 reported the stability of our scan disc for several months at room temperature for the detection of *P.*  
325 *falciparum* (Yamamoto et al., 2019). Furthermore, our malaria diagnostic system is easy to operate  
326 and can accurately measure parasitic density independent of technical expertise. Hence, these  
327 features of our system can be advantageous for POC field use.

328         The effective use of POC test results is particularly important for evaluating a region's  
329 malaria endemic status. However, the manual management of huge analog data from RDTs and  
330 microscopy is labor intensive. In our system, diagnostic data such as parasitemia and  
331 negative/positive results are digitally stored, which enables reporting of a large amount of data to the  
332 central systems such as the Ministry of Health. The effective analysis of such "big data" by  
333 sophisticated statistical methods will provide important insights into designing efficient strategies to  
334 control and/or eliminate malaria in the future.

335         In conclusion, we have developed an automated, quantitative malaria diagnostic system using  
336 a fluorescent Blue-ray optical device. The only manual steps involved in the use of this system are  
337 the dilution of the blood sample and its injection into a scan disc (Video 1), which would enable  
338 local health authorities to achieve the stable detection and quantification of parasitemia. Field testing  
339 of the system in Kenya revealed that the diagnostic system has a high diagnostic accuracy. These  
340 promising results indicate the potential of this diagnostic system as a valid alternative to  
341 conventional methods used at local health facilities, which lack basic infrastructure.

342

## 343 **Materials and Methods**

### 344 **Automated malaria diagnostic system design**

345         The automated malaria diagnostic system is primarily composed of two devices (Figure 6A):  
346 the scan disc (EZBNPC01AT, Panasonic Corp., Osaka, Japan) (Figure 6B) and the fluorescence  
347 image reader (EZBLMOH01T, Panasonic Corp.) (Figure 6C). The scan disc has a flow-path disc  
348 component and an optical disc component with a *Plasmodium* staining unit. The function of the scan  
349 disc is to isolate the RBCs and deploy them in a monolayer formation onto the staining unit. In the  
350 staining unit, malaria parasites are fluorescently stained with a nuclear-specific fluorescence stain,  
351 Hoechst 34580 (Molecular Probes Inc., Eugene, OR, USA). The fluorescence image reader detects  
352 the fluorescently stained nuclei of the malaria parasites. The identification of *P. falciparum* and the  
353 quantitative measurement of the proportion of infected RBCs among all counted RBCs are  
354 performed using a custom-made software. The system was designed for protection against particles  
355 and water based on the criteria stipulated by the International Electrotechnical Commission IP52  
356 (IEC 60529, “Degrees of protection provided by enclosures (IP Code),” 2013). The detailed design  
357 of the diagnostic system is described in our previous study (Yamamoto et al., 2019).

358

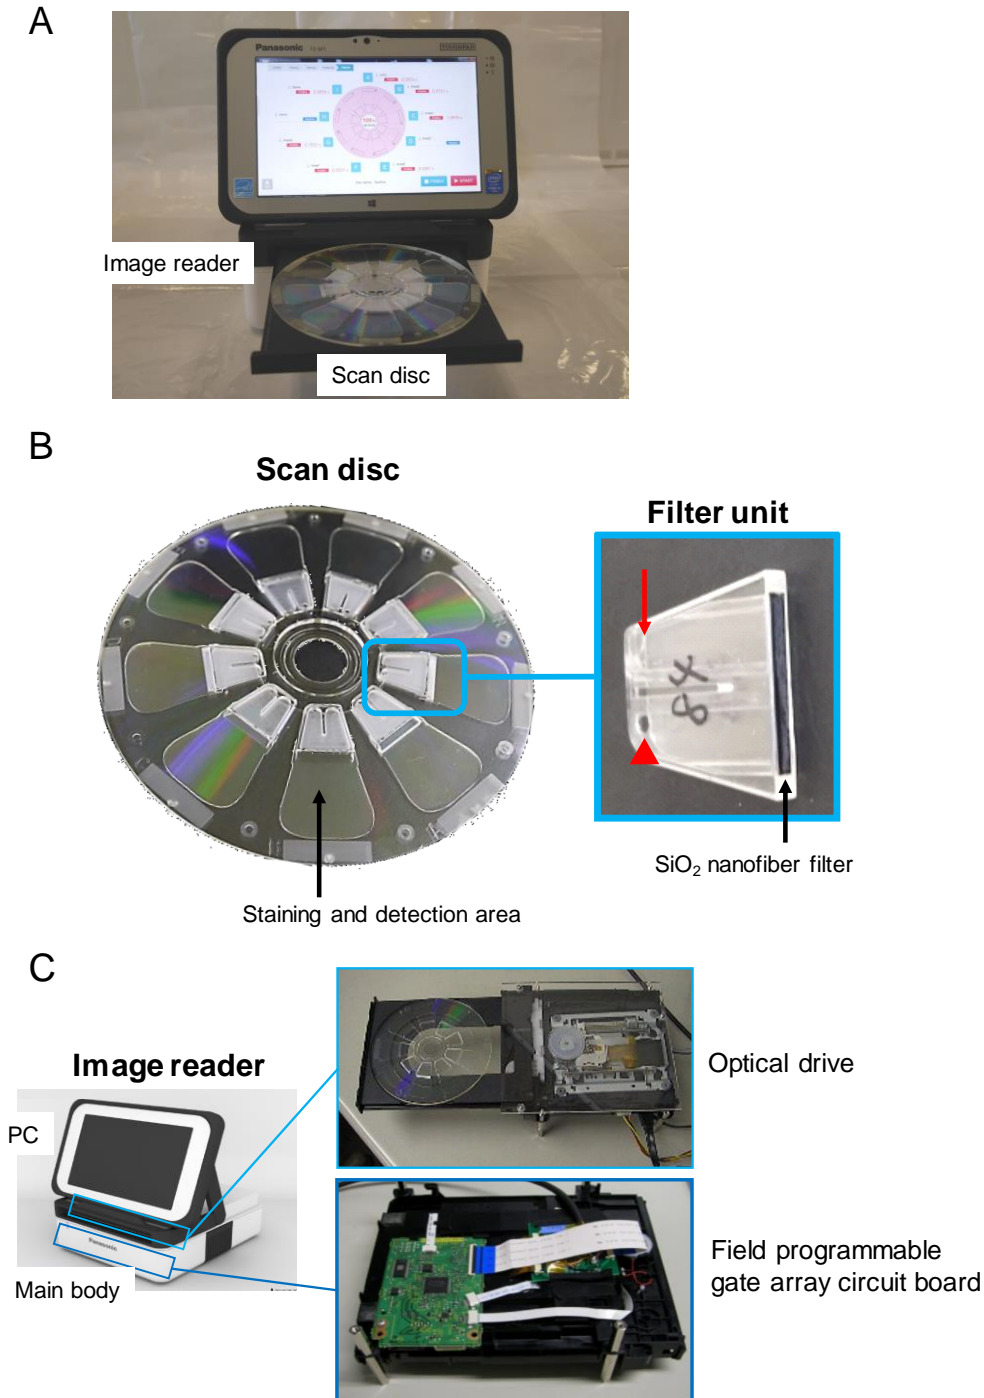

359

360 **Figure 6.** Design of the fully automated, quantitative malaria diagnostic system. (A) The fully automated,  
361 quantitative malaria diagnostic system consists of an image reader (upper) and a scan disc (lower). (B)  
362 Scan disc (left) and detailed schema of the filter unit (right). The filter unit has an air vent (arrow), and a  
363 sample injection port (arrow-head). Schematic diagram of a cross section of the scan disc is shown in  
364 Figure 6-figure supplement 1. (C) The image reader consists of a tablet PC (upper) and a main body  
365 (lower) equipped with a Blue-ray optical component.

366

## 367 **Development of SiO<sub>2</sub> nanofiber device**

368 We developed a SiO<sub>2</sub> nanofiber filter that was small enough (15 mm × 2 mm, 250 μm  
369 thickness) to be placed inside the scan disc. The redesigned SiO<sub>2</sub> nanofiber filter was positioned next  
370 to the blood sample injection site (Figure 6B). When the blood sample is applied to the scan disc, it  
371 first passes through the SiO<sub>2</sub> nanofiber filter, where the WBCs and platelets are trapped resulting in  
372 effective RBC isolation. To develop the SiO<sub>2</sub> nanofiber filter-containing scan disc, an air vent was  
373 needed to inject the 200-μL volume of sample using a pipette. However, upon injection of sample  
374 only the area between the air vent and sample injection port was filled. Therefore, to fill the entire  
375 filter unit with the sample, it was necessary to place two holes at the most distant positions apart,  
376 such that the sample injection port would be on the inner peripheral side and the air vent would be on  
377 the outer peripheral side. However, when centrifugal force was applied, the sample leaked from the  
378 hole located on the outer periphery. Hence, we created a partition in the middle and the inner  
379 structure (Figure. 6B). Through this technical improvement, we were able to establish both the  
380 sample injection port and the air hole on the inner peripheral side. Blood samples obtained from  
381 individuals in Kenya were used for evaluating the removal of WBC by the redesigned SiO<sub>2</sub> nanofiber  
382 filter. We also evaluated the removal of platelets from the blood samples of healthy Japanese  
383 volunteers using the redesigned SiO<sub>2</sub> nanofiber filter. We used this technique to determine the  
384 platelet count as we did not have adequate laboratory facilities to accurately determine the number of  
385 platelets.

386

## 387 **Study site for the evaluation of the system**

388 A field test was conducted in February 14–23 2018 to evaluate the performance and field  
389 application of our diagnosis system. The area of the study region, which was in the Gembe East Sub-  
390 location in Homa Bay County (Mbita District, Nyanza Province, western Kenya, 0°28'24.06"S,

391 34°19'16.82"E), was approximately 12 km<sup>2</sup> and included 14 villages (Minakawa et al., 2015). In this  
392 site, the annual rainfall ranges from 700 to 1200 mm, with two rainy seasons (from March to June  
393 and from November to December). All *Plasmodium* species that cause malaria in humans, except  
394 *Plasmodium vivax*, was reported in this region. Additionally, *P. falciparum* (>90%) was reported to  
395 be the most prevalent species in this region (Idris et al., 2016). The prevalence rate of malarial  
396 parasites in the study region evaluated by microscopic diagnosis and PCR was approximately 15–  
397 24% and 30–44%, respectively (Idris et al., 2016). *Anopheles gambiae sensu stricto*, *Anopheles*  
398 *arabiensis*, and *Anopheles funestus* are the main malaria vectors in the study region (Minakawa et al.,  
399 2002; Zhou et al., 2004).

400 We obtained ethical approval to conduct the study from the Kenya Medical Research Institute  
401 Ethical Review Committee (KEMRI/RES/7/3/1, SSC No. 3168), and the National Institute of  
402 Advanced Industrial Science and Technology (AIST) ethics committee (No. 2017-156).

403

#### 404 **Blood collection**

405 The minimum number of subjects to be enrolled for the study was determined based on the  
406 table of power estimates reported by Flahault et al (Flahault et al., 2005). According to their study,  
407 50 infected individuals are sufficient to detect *P. falciparum* with an expected sensitivity of 95% and  
408 a lower bound 95% confidence interval value of 80%. We assumed that the prevalence of *P.*  
409 *falciparum* infection in the study area was 20%, which estimated that 250 individuals must be  
410 recruited for the study. This estimate is well matched to the sample size used in our study.

411 The study was conducted using a community-based cross-sectional survey in all villages and  
412 14 primary/secondary schools. We collected the blood samples from school children aged 1-16 years  
413 using finger-prick technique. The consent to participate in this study was obtained directly from the  
414 children in the presence of legal guardians or through their parents. Blood collection was performed  
415 from 8 am to 1 pm. The blood samples were stored in BD Microtainer Tubes containing K<sub>2</sub>EDTA

416 (Becton, Dickinson and Company, Franklin Lakes, NJ, USA) and immediately transferred to the  
417 central laboratories at the International Centre of Insect Physiology and Ecology (Nairobi, Kenya).  
418 We analyzed a maximum of 40 samples in one day. The hemoglobin level was measured with a  
419 HemoCue Hb201+ system (HemoCue AB, Ängelholm, Sweden). *P. falciparum* infection was  
420 screened using a commercial RDT kit (Paracheck-Pf® Rapid Test for *P. falciparum*, ver. 3, Orchid  
421 Biomedical Systems, Verna, Goa, India). We prepared thin and thick blood smears on site. The thin  
422 blood smears were fixed with methanol. All smears were stained with 10% Giemsa solution for 10  
423 min and examined under oil immersion under a light microscope (Olympus, Co., Ltd., Tokyo, Japan)  
424 at 1000X magnification.

425 For molecular analysis, whole-blood samples (20 µL) were transferred onto Whatman FTA®  
426 microcards (GE Healthcare, Chicago, IL, USA). The samples were allowed to dry at room  
427 temperature and stored separately in plastic bags at -20°C. DNA was extracted from the 5.5-mm-  
428 diameter blood spots using the QIAamp DNA Micro Kit (QIAGEN, Venlo, Netherlands). The final  
429 elution volume was 20 µL. Individuals who tested positive for malaria were treated with  
430 Artemether–lumefantrine.

431 The purpose and procedure of the study were informed to the participants through local  
432 interpreters. Written informed consent was obtained from their parents or legal guardians.

433

#### 434 **Diagnosis of malaria by 18S rRNA nested PCR and microscopic examination**

435 Species-specific nPCR was used to detect the *P. falciparum* infection, as described previously  
436 (Johnston et al., 2006; Snounou et al., 1993). This method targets the 18S rRNA gene of *P.*  
437 *falciparum* (Johnston et al., 2006; Snounou et al., 1993). The genome of *P. falciparum* has 5–8  
438 copies of 18S rRNA. The 18S rRNA is commonly used for DNA-based malaria detection methods  
439 (Mercereau-Puijalon et al., 2002). The reported LOD of this method varies from 1 to 50 parasites/µL  
440 (Li et al., 2014; Snounou et al., 1993; Wang et al., 2014; WHO, 2014). In this study, we determined



441 the LOD of parasite density using a laboratory-adapted 3D7 clone at a density range of 0.0375–4  
442 parasites/ $\mu\text{L}$  (using 2-fold dilutions in 12 different rows). Probit analysis was performed to determine  
443 the minimal density at which the parasite would be detected with 95% confidence. Parasitemia in *P.*  
444 *falciparum*-positive cases was determined by counting 10,000 RBC using thin blood smears or  
445 counting 500 WBCs using thick blood smears, while that in *P. falciparum*-negative cases was  
446 determined by counting 500 WBCs in thick blood smears through microscopic examination.

447

### 448 **Malaria diagnosis by the automated malaria diagnostic system**

449 The measurement of parasitemia (percentage of parasite-infected RBCs) in the automated  
450 malaria diagnostic system comprises six steps (Figure 7A and Video 1). The first three steps are  
451 manually performed by the technician and the last three steps are automated in the device. The steps  
452 involved in the diagnosis are as follows: Step 1, the finger-prick blood sample is collected into a  
453 capillary tube. The blood (2  $\mu\text{L}$ ) is then manually diluted (1:100) using a buffer solution (198  $\mu\text{L}$ );  
454 Step 2, the diluted blood sample is injected into the scan disc; Step 3, the scan disc is set up in the  
455 fluorescence image reader; Step 4, the diluted sample is automatically passed through the  $\text{SiO}_2$   
456 nanofiber filter by centrifugal force. The purified RBCs are deployed onto the detection area in a  
457 monolayer formation (Figure 7B); Step 5, malaria parasites present in the sample are fluorescently  
458 stained (Figure 7C) and the fluorescent signals are captured by the fluorescence image reader; Step 6,  
459 the number of RBCs and malaria parasites present in the RBCs is automatically estimated from the  
460 fluorescent image by the built-in image-processing software program (EZBLMOS01T-A, Panasonic  
461 Corp.). The scan disc can analyze nine samples simultaneously in approximately 40 min. The time  
462 required for the measurement is proportional to the scanning distance of the radial direction of the  
463 scan disc. If the number of RBCs to be measured can be reduced, it is possible to shorten the  
464 measurement time.

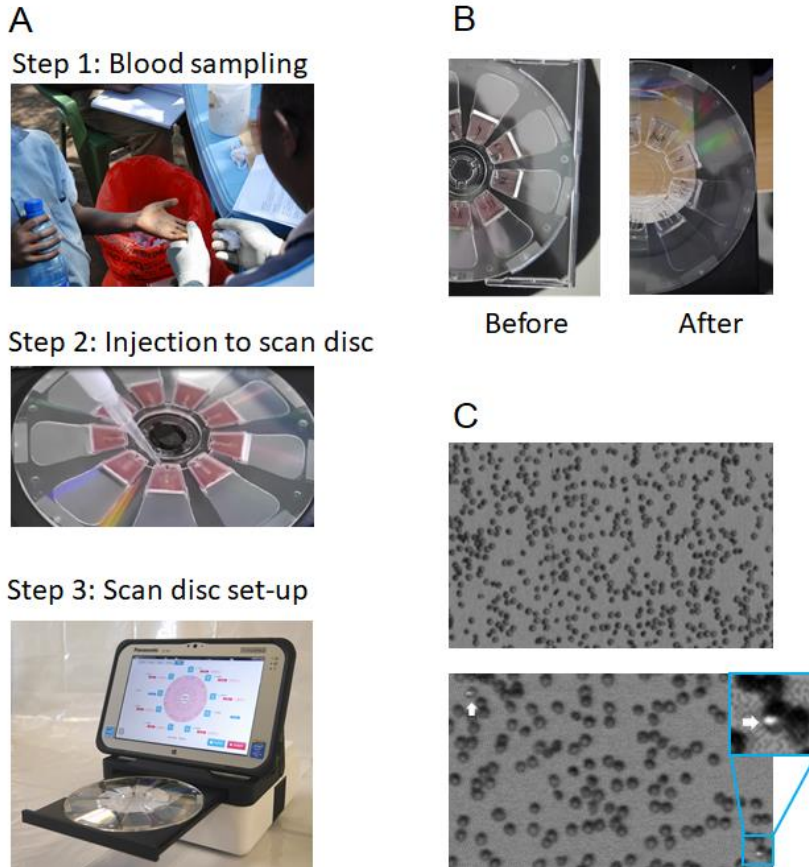

465

466 **Figure 7.** Process for malaria diagnosis using the automated malaria diagnostic system. (A) The manual  
467 steps involved in automatic malaria diagnostic system: blood sampling, injection into the scan disc, and  
468 scan disc setup. (B) Diluted samples before and after filtration by centrifugal force. (C) Fluorescent  
469 images of red blood cells (RBCs) in the detection area captured by the automated malaria diagnostic  
470 system. (Upper) RBCs are deployed in a monolayer formation. (Lower) Malaria parasites (arrows) are  
471 fluorescently stained in the detection area. High-magnification fluorescent image of *Plasmodium*  
472 *falciparum*-infected RBCs on the disc. The target malaria parasites were analyzed quantitatively at the  
473 single-cell level.

474

### 475 **Statistical analysis**

476 The CV, which is defined as the value that produces an error probability of 0.05 when true  
477 negative samples are measured, was used as the cutoff level to distinguish the parasite-positive  
478 samples from the parasite-negative samples by this system (Currie, 1995; IUPAC, 1997). The CV  
479 was determined based on the definition provided by International Union of Pure and Applied

480 Chemistry (IUPAC, 1997):  $CV = \text{mean} + 1.645 \text{ standard deviation (SD)}$ . The LOD, which is defined  
481 as the value that produces an error probability of 0.05 when samples having a LOD level are  
482 measured, was calculated using the following formula:  $LOD = \text{mean} + 3.29 \text{ SD}$  (Currie, 1995;  
483 IUPAC, 1997). In this study, the samples that tested negative for the parasites in nPCR and verified  
484 by microscopic evaluation were used as true negatives for determining the CV and LOD. When the  
485 parasitemia percentage determined by our automated system was higher than the CV, the sample was  
486 considered as parasite-positive. Conversely, when the parasitemia percentage determined by the  
487 system was lower than the CV, the sample was considered as parasite negative.

488 The significance of discordance was measured by Welch's t test, Chi-squared test or  
489 McNemar's test. All statistical analyses were performed using R version 3.6.0. Exact 95%  
490 confidence intervals (CIs) were computed for sensitivity, specificity, positive and negative predictive  
491 values, and accuracy using binomial distributions with Clopper-Pearson method (Clopper and  
492 Pearson, 1934). Pearson's correlation test and Spearman's rank-correlation test were used to evaluate  
493 the degree of correlation between the percentage parasitemia obtained by our diagnostic system and  
494 that obtained by microscopy. A linear regression analysis was also performed to correlate the  
495 percentage parasitemia values obtained by these two detection methods. (Team, 2014)The difference  
496 was considered statistically significant when the P-value was less than 0.05.

497

## 498 **Acknowledgments**

499 We thank Izumi Shibata, Satoko Fushimi and Shin-Ichiro Tachibana for technical assistance.  
500 And we thank Noriaki Terahara, Fumitomo Yamasaki, Masumi Ogawara, Takeshi Ohmori, Tsutomu  
501 Kawanishi, and Yasuhiro Mamiya for their help in developing our diagnosis system. This study was  
502 conducted at the Kenya Research Center, Institute of Tropical Medicine, Nagasaki University, Japan.  
503 This paper was published with the permission of the Director of Kenya Medical Research Institute.

504

505 **Competing interests**

506 The authors declare no conflict of interest.

507

508 **References**

509 Alonso, P., Noor, A.M., 2017. The global fight against malaria is at crossroads. *Lancet* 390, 2532-  
510 2533.

511 Aydin-Schmidt, B., Mubi, M., Morris, U., Petzold, M., Ngasala, B.E., Premji, Z., Bjorkman, A.,  
512 Martensson, A., 2013. Usefulness of *Plasmodium falciparum*-specific rapid diagnostic tests for  
513 assessment of parasite clearance and detection of recurrent infections after artemisinin-based  
514 combination therapy. *Malar J* 12, 349.

515 Bell, D., Wongsrichanalai, C., Barnwell, J.W., 2006. Ensuring quality and access for malaria  
516 diagnosis: how can it be achieved? *Nature reviews. Microbiology* 4, S7-20.

517 Bousema, T., Dinglasan, R.R., Morlais, I., Gouagna, L.C., van Warmerdam, T., Awono-Ambene,  
518 P.H., Bonnet, S., Diallo, M., Coulibaly, M., Tchuinkam, T., 2012. Mosquito feeding assays to  
519 determine the infectiousness of naturally infected *Plasmodium falciparum* gametocyte carriers. *PloS*  
520 *one* 7, e42821.

521 Bousema, T., Okell, L., Felger, I., Drakeley, C., 2014. Asymptomatic malaria infections:  
522 detectability, transmissibility and public health relevance. *Nature reviews. Microbiology* 12, 833-  
523 840.

524 Bouwhuis, G., Braat, J., Huijser, A., Pasman, J., van Rosmalen, G., Schouhamer I.K., 1985.  
525 *Principles of optical disc systems*. Adam Hilger Ltd, Bristol.

526 Boyce, M.R., O'Meara, W.P., 2017. Use of malaria RDTs in various health contexts across sub-  
527 Saharan Africa: a systematic review. *BMC Public Health* 17.

528 Clopper, C.J., Pearson, E.S., 1934. The use of confidence or fiducial limits illustrated in the case of  
529 the binomial. *Biometrika* 26, 404-413.

530 Currie, L.A., 1995. Nomenclature in evaluation of analytical methods including detection and  
531 quantification capabilities (IUPAC Recommendations 1995). *Pure and Applied Chemistry* 67, 1699-  
532 1723.

533 Davis, L.R., 1976. Changing blood picture in sickle-cell anaemia from shortly after birth to  
534 adolescence. *Journal of clinical pathology* 29, 898-901.

535 de Porto, A.P., Lammers, A.J., Bennink, R.J., ten Berge, I.J., Speelman, P., Hoekstra, J.B., 2010.  
536 Assessment of splenic function. *Eur J Clin Microbiol Infect Dis* 29, 1465-1473.

537 Flahault, A., Cadilhac, M., Thomas, G., 2005. Sample size calculation should be performed for  
538 design accuracy in diagnostic test studies. *J Clin Epidemiol* 58, 859-862.

539 Gomez-Perez, G.P., van Bruggen, R., Grobusch, M.P., Dobano, C., 2014. *Plasmodium falciparum*  
540 malaria and invasive bacterial co-infection in young African children: the dysfunctional spleen  
541 hypothesis. *Malar J* 13, 335.

542 Goncalves, B.P., Kapulu, M.C., Sawa, P., Guelbeogo, W.M., Tiono, A.B., Grignard, L., Stone, W.,  
543 Hellewell, J., Lanke, K., Bastiaens, G.J.H., Bradley, J., Nebie, I., Ngoi, J.M., Oriango, R., Mkabili,  
544 D., Nyaurah, M., Midega, J., Wirth, D.F., Marsh, K., Churcher, T.S., Bejon, P., Sirima, S.B.,  
545 Drakeley, C., Bousema, T., 2017. Examining the human infectious reservoir for *Plasmodium*  
546 *falciparum* malaria in areas of differing transmission intensity. *Nature communications* 8, 1133.

547 Harrod, V.L., Howard, T.A., Zimmerman, S.A., Dertinger, S.D., Ware, R.E., 2007. Quantitative  
548 analysis of Howell-Jolly bodies in children with sickle cell disease. *Exp Hematol* 35, 179-183.

549 Idris, Z.M., Chan, C.W., Kongere, J., Gitaka, J., Logedi, J., Omar, A., Obonyo, C., Machini, B.K.,  
550 Isozumi, R., Teramoto, I., Kimura, M., Kaneko, A., 2016. High and Heterogeneous Prevalence of  
551 Asymptomatic and Sub-microscopic Malaria Infections on Islands in Lake Victoria, Kenya.  
552 *Scientific reports* 6, 36958.

553 IUPAC, 1997. *Compendium of Chemical Terminology*, 2 ed. Blackwell Scientific Publications,  
554 Oxford, UK.

- 555 J., A.K., 1988. Fundamentals of Digital Image Processing. Prentice Hall, London.
- 556 Johnston, S.P., Pieniazek, N.J., Xayavong, M.V., Slemenda, S.B., Wilkins, P.P., da Silva, A.J., 2006.
- 557 PCR as a confirmatory technique for laboratory diagnosis of malaria. *J Clin Microbiol* 44, 1087-
- 558 1089.
- 559 Lavin, A., Vicente, J., Holgado, M., Laguna, M.F., Casquel, R., Santamaria, B., Maigler, M.V.,
- 560 Hernandez, A.L., Ramirez, Y., 2018. On the Determination of Uncertainty and Limit of Detection in
- 561 Label-Free Biosensors. *Sensors (Basel)* 18.
- 562 Lee, B.S., Lee, J.-N., Park, J.-M., Lee, J.-G., Kim, S., Cho, Y.-K., Ko, C., 2009. A fully automated
- 563 immunoassay from whole blood on a disc. *Lab on a Chip* 9, 1548-1555.
- 564 Li, P., Zhao, Z., Wang, Y., Xing, H., Parker, D.M., Yang, Z., Baum, E., Li, W., Sattabongkot, J.,
- 565 Sirichaisinthop, J., Li, S., Yan, G., Cui, L., Fan, Q., 2014. Nested PCR detection of malaria directly
- 566 using blood filter paper samples from epidemiological surveys. *Malar J* 13, 175.
- 567 Lin, J.T., Ubalee, R., Lon, C., Balasubramanian, S., Kuntawunginn, W., Rahman, R., Saingam, P.,
- 568 Heng, T.K., Vy, D., San, S., 2015. Microscopic Plasmodium falciparum gametocytemia and
- 569 infectivity to mosquitoes in Cambodia. *The Journal of infectious diseases* 213, 1491-1494.
- 570 Lukianova-Hleb, E.Y., Campbell, K.M., Constantinou, P.E., Braam, J., Olson, J.S., Ware, R.E.,
- 571 Sullivan, D.J., Jr., Lapotko, D.O., 2014. Hemozoin-generated vapor nanobubbles for transdermal
- 572 reagent- and needle-free detection of malaria. *Proc Natl Acad Sci U S A* 111, 900-905.
- 573 Lynch, E.C., 1990. Peripheral Blood Smear, in: rd, Walker, H.K., Hall, W.D., Hurst, J.W. (Eds.),
- 574 *Clinical Methods: The History, Physical, and Laboratory Examinations*, Boston.
- 575 Mercereau-Puijalon, O., Barale, J.-C., Bischoff, E., 2002. Three multigene families in Plasmodium
- 576 parasites: facts and questions. *International journal for parasitology* 32, 1323-1344.
- 577 Minakawa, N., Kongere, J.O., Dida, G.O., Ikeda, E., Hu, J., Minagawa, K., Futami, K., Kawada, H.,
- 578 Njenga, S.M., Larson, P.S., 2015. Sleeping on the floor decreases insecticide treated bed net use and

579 increases risk of malaria in children under 5 years of age in Mbita District, Kenya. *Parasitology* 142,  
580 1516-1522.

581 Minakawa, N., Seda, P., Yan, G., 2002. Influence of host and larval habitat distribution on the  
582 abundance of African malaria vectors in western Kenya. *Am J Trop Med Hyg* 67, 32-38.

583 Okell, L.C., Bousema, T., Griffin, J.T., Ouedraogo, A.L., Ghani, A.C., Drakeley, C.J., 2012. Factors  
584 determining the occurrence of submicroscopic malaria infections and their relevance for control.  
585 *Nature communications* 3, 1237.

586 Ouedraogo, A.L., Bousema, T., Schneider, P., de Vlas, S.J., Ilboudo-Sanogo, E., Cuzin-Ouattara, N.,  
587 Nebie, I., Roeffen, W., Verhave, J.P., Luty, A.J.F., Sauerwein, R., 2009. Substantial Contribution of  
588 Submicroscopical *Plasmodium falciparum* Gametocyte Carriage to the Infectious Reservoir in an  
589 Area of Seasonal Transmission. *Plos One* 4, e8410.

590 Parr, J.B., Verity, R., Doctor, S.M., Janko, M., Carey-Ewend, K., Turman, B.J., Keeler, C., Slater,  
591 H.C., Whitesell, A.N., Mwandagilirwa, K., 2016. Pfhrp2-deleted *Plasmodium falciparum* parasites  
592 in the Democratic Republic of the Congo: a national cross-sectional survey. *The Journal of infectious*  
593 *diseases* 216, 36-44.

594 Pearson, H.A., Spencer, R.P., Cornelius, E.A., 1969. Functional asplenia in sickle-cell anemia. *N*  
595 *Engl J Med* 281, 923-926.

596 Peng, W.K., Kong, T.F., Ng, C.S., Chen, L., Huang, Y., Bhagat, A.A., Nguyen, N.T., Preiser, P.R.,  
597 Han, J., 2014. Micromagnetic resonance relaxometry for rapid label-free malaria diagnosis. *Nat Med*  
598 20, 1069-1073.

599 Racska, L.D., Gander, R.M., Southern, P.M., McElvania TeKippe, E., Doern, C., Luu, H.S., 2015.  
600 Detection of intracellular parasites by use of the CellaVision DM96 analyzer during routine  
601 screening of peripheral blood smears. *J Clin Microbiol* 53, 167-171.

- 602 Rosado, L., da Costa, J.M.C., Elias, D., Cardoso, J.S., 2017. Mobile-Based Analysis of Malaria-  
603 Infected Thin Blood Smears: Automated Species and Life Cycle Stage Determination. *Sensors*  
604 (Basel) 17.
- 605 Sears, D.A., Udden, M.M., 2012. Howell-Jolly bodies: a brief historical review. *Am J Med Sci* 343,  
606 407-409.
- 607 Snounou, G., Viriyakosol, S., Zhu, X.P., Jarra, W., Pinheiro, L., do Rosario, V.E., Thaithong, S.,  
608 Brown, K.N., 1993. High sensitivity of detection of human malaria parasites by the use of nested  
609 polymerase chain reaction. *Mol Biochem Parasitol* 61, 315-320.
- 610 Tadesse, F.G., Slater, H.C., Chali, W., Teelen, K., Lanke, K., Belachew, M., Menberu, T., Shumie,  
611 G., Shitaye, G., Okell, L.C., 2018. The relative contribution of symptomatic and asymptomatic  
612 *Plasmodium vivax* and *Plasmodium falciparum* infections to the infectious reservoir in a low-  
613 endemic setting in Ethiopia. *Clinical infectious diseases* 66, 1883-1891.
- 614 Team, R.C., 2014. R: A language and environment for statistical computing.
- 615 Tougan, T., Suzuki, Y., Itagaki, S., Izuka, M., Toya, Y., Uchihashi, K., Horii, T., 2018. An  
616 automated haematology analyzer XN-30 distinguishes developmental stages of *falciparum* malaria  
617 parasite cultured in vitro. *Malar J* 17, 59.
- 618 Wang, B., Han, S.S., Cho, C., Han, J.H., Cheng, Y., Lee, S.K., Galappaththy, G.N., Thimasarn, K.,  
619 Soe, M.T., Oo, H.W., Kyaw, M.P., Han, E.T., 2014. Comparison of microscopy, nested-PCR, and  
620 Real-Time-PCR assays using high-throughput screening of pooled samples for diagnosis of malaria  
621 in asymptomatic carriers from areas of endemicity in Myanmar. *J Clin Microbiol* 52, 1838-1845.
- 622 WHO, 2011. Global plan for artemisinin resistance containment 2011. World Health Organization,  
623 Geneva.
- 624 WHO, 2014. WHO Evidence Review Group on Malaria Diagnosis in Low Transmission Settings.
- 625 WHO, 2015. Global Technical Strategy for Malaria 2016-2030. World Health Organization, Geneva.
- 626 WHO, 2018. World Malaria Report 2018. World Health Organization, Geneva.



627 Wongsrichanalai, C., Barcus, M.J., Muth, S., Sutamihardja, A., Wernsdorfer, W.H., 2007. A review  
628 of malaria diagnostic tools: microscopy and rapid diagnostic test (RDT). *Am J Trop Med Hyg* 77,  
629 119-127.

630 Yamamoto, T., Yatsushiro, S., Hashimoto, M., Kajimoto, K., Ido, Y., Abe, K., Sofue, Y., Nogami,  
631 T., Hayashi, T., Nagatomi, K., Minakawa, N., Oka, H., Mita, T., Kataoka, M., 2019. Development of  
632 a highly sensitive, quantitative, and rapid detection system for *Plasmodium falciparum*-infected red  
633 blood cells using a fluorescent blue-ray optical system. *Biosens Bioelectron* 132, 375-381.

634 Yatsushiro, S., Yamamoto, T., Yamamura, S., Abe, K., Obana, E., Nogami, T., Hayashi, T., Sesei,  
635 T., Oka, H., Okello-Onen, J., Odongo-Aginya, E.I., Alai, M.A., Olia, A., Anywar, D., Sakurai, M.,  
636 Palacpac, N.M., Mita, T., Horii, T., Baba, Y., Kataoka, M., 2016. Application of a cell microarray  
637 chip system for accurate, highly sensitive, and rapid diagnosis for malaria in Uganda. *Scientific*  
638 *reports* 6, 30136.

639 Zhou, G., Minakawa, N., Githeko, A., Yan, G., 2004. Spatial distribution patterns of malaria vectors  
640 and sample size determination in spatially heterogeneous environments: a case study in the west  
641 Kenyan highland. *Journal of medical entomology* 41, 1001-1009.

642

643 **List of Figures, Figure supplements, Tables, Video Source data files and**  
644 **supplementary files.**

645 Figure 1. Limit of detection of 18S rRNA PCRs.

646 Figure 2. Flow diagram for the diagnosis of malaria parasites in the participants.

647 Figure 3. Evaluation of reformed SiO<sub>2</sub> nanofiber device for the removal of WBCs.

648 Figure 4. Discrimination of malaria parasites, WBCs and platelets on the fluorescent blue-ray optical  
649 system.

650 Figure 4-figure supplement 1. Tracing directions of fluorescence- intensity profile

651 Figure 5. Linear regression analysis of the correlation of the percentage parasitemia obtained by the  
652 automated malaria diagnostic system with that obtained microscopically.

653 Figure 6. Design of the fully automated, quantitative malaria diagnostic system.

654 Figure 6-figure supplement 1. Schematic diagram of a cross section of the scan disc

655 Figure 7. Process for malaria diagnosis using the automated malaria diagnostic system.

656 Table 1. Demographic characteristics of 274 Kenyan individuals.

657 Table 2. Diagnostic performance of Plasmodium falciparum infection in 274 Kenyan individuals.

658 Table 3. Evaluation of reformed SiO<sub>2</sub> nanofiber device for the removal of platelets.

659 Table 4. Number of RBCs and fluorescent-positive spots on the detection area.

660 Table 5. Critical value (CV) and limit of detection (LOD) of parasites of the automated malaria  
661 diagnostic system.

662 Table 6. Characteristics of false-positive cases with automated malaria diagnostic system.

663 Table 7. Diagnostic accuracy of automated malaria diagnostic system for 40 Japanese volunteers

664 Video 1. Diagnostic steps in the automated malaria diagnostic system.

665 Supplementary File 1. False-positive cases with automated malaria diagnostic system.

Figure 4-figure supplement 1. Tracing directions of fluorescence- intensity profile

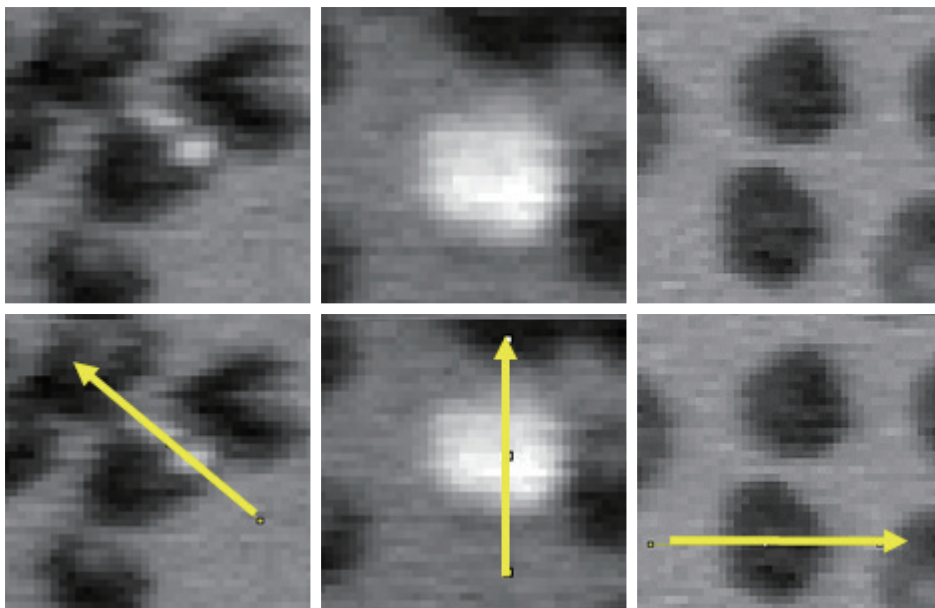

Figure 6-figure supplement 1.  
Schematic diagram of a cross section of the scan disc

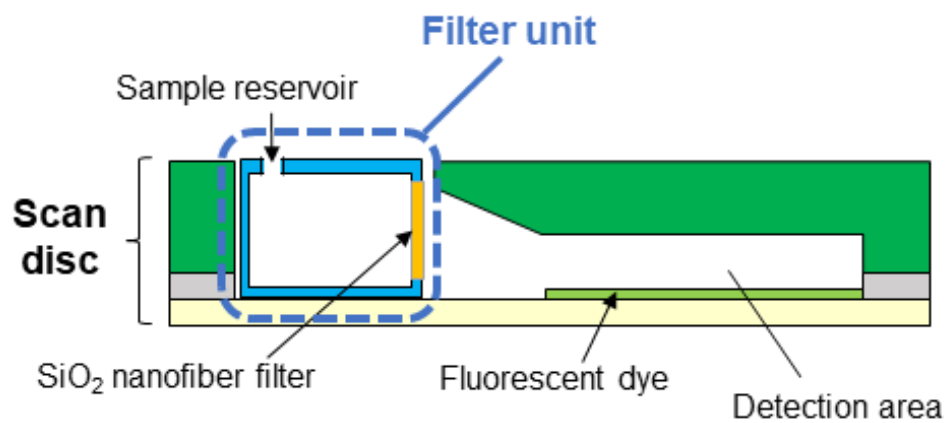

Source: https://www.biorxiv.org/content/biorxiv/early/2019/07/31/721076.full.pdf
